# Supplementary material for: The Interplay between Cardiovascular Risk, Cardiovascular Events, and Disease Activity in Primary Sjögren’s Syndrome: Is Uric Acid the Missing Link?
Source: MDPI journal article supplement (doi:10.3390/nu15071563), 2023-03-23
Supplement: s1 [file s1]

## Supplementary Material

**Supplementary Table S1.** Prevalence of disease manifestations according to serum uric acid level (SUA) in the full cohort (N=105).

|                           | SUA < 4.79 mg/dL (N=81) |    | SUA ≥ 4.79 mg/dL (N=24) |    |         |
|---------------------------|-------------------------|----|-------------------------|----|---------|
| ESSDAI DOMAINS            | N                       | %  | N                       | %  | p value |
| Constitutional            | 11                      | 14 | 7                       | 29 | 0.119   |
| Lymphadenopathy           | 22                      | 27 | 9                       | 38 | 0.445   |
| Glandular                 | 11                      | 14 | 8                       | 33 | 0.037   |
| Articular                 | 59                      | 73 | 17                      | 71 | 0.847   |
| Cutaneous                 | 6                       | 7  | 2                       | 8  | 0.881   |
| Pulmonary                 | 0                       | 0  | 5                       | 21 | <0.001  |
| Renal                     | 0                       | 0  | 0                       | 0  | -       |
| Muscular                  | 0                       | 0  | 0                       | 0  | -       |
| Peripheral nervous system | 13                      | 16 | 5                       | 21 | 0.553   |
| Central nervous system    | 0                       | 0  | 0                       | 0  | -       |
| Hematological             | 7                       | 9  | 10                      | 42 | <0.001  |
| Biological                | 22                      | 27 | 6                       | 25 | 0.833   |

ESSDAI, EULAR Sjögren's syndrome disease activity index; SUA, serum uric acid.

**Supplementary Table S2.** Clinical characteristics of the full cohort (N=105) stratified by different serum uric acid cut-off values.

|                            | SUA <4.79 mg/dL |     | 4.79 mg dL ≤SUA<5.6 mg/dL |     | SUA ≥ 5.6 mg/dL |     |         |
|----------------------------|-----------------|-----|---------------------------|-----|-----------------|-----|---------|
|                            | N=81            |     | N=17                      |     | N=7             |     |         |
|                            | Mean            | SD  | Mean                      | SD  | Mean            | SD  | p value |
| <b>ESSDAI</b>              | 5.5             | 4.2 | 8.7                       | 4.6 | 9.9             | 8.0 | 0.019   |
| <b>ClinESSDAI</b>          | 5.2             | 4.1 | 8.5                       | 4.6 | 9.4             | 7.3 | 0.013   |
| <b>ESSPRI</b>              | 6.3             | 2.3 | 6.6                       | 2.0 | 6.1             | 3.3 | 0.882   |
| <b>VAS dryness</b>         | 6.1             | 2.4 | 6.2                       | 2.4 | 5.3             | 2.7 | 0.648   |
| <b>VAS xerostomia</b>      | 6.3             | 2.6 | 6.3                       | 3.4 | 5.8             | 2.4 | 0.699   |
| <b>VAS xerophtalmia</b>    | 5.8             | 3.0 | 6.0                       | 2.4 | 4.8             | 3.3 | 0.670   |
| <b>VAS vaginal dryness</b> | 5.1             | 3.3 | 6.6                       | 3.2 | 7.2             | 1.9 | 0.124   |
| <b>VAS pain</b>            | 5.7             | 3.3 | 6.1                       | 2.5 | 6.3             | 4.1 | 0.794   |
| <b>VAS fatigue</b>         | 7.1             | 2.7 | 7.6                       | 2.6 | 6.5             | 3.7 | 0.757   |

SD, standard deviation; ESSDAI, EULAR Sjögren's syndrome disease activity index; ESSPRI, EULAR Sjögren's Syndrome Patient Reported Index; VAS, visual analog scale; SUA, serum uric acid.

**Supplementary Table S3.** Prevalence of disease manifestations according to various cut-off values of serum uric acid level (SUA) in the full cohort (N=105).

|                           | SUA <4.79 mg/dL | 4.79 mg dL ≤SUA<5.6 mg/dL | SUA ≥ 5.6 mg/dL |         |
|---------------------------|-----------------|---------------------------|-----------------|---------|
|                           | N=81            | N=17                      | N=7             |         |
| ESSDAI DOMAINS            | N (%)           |                           |                 | p value |
| Constitutional            | 11 (13)         | 4 (23)                    | 3 (43)          | 0.11    |
| Lymphadenopathy           | 22 (27)         | 6 (35)                    | 3 (43)          | 0.58    |
| Glandular                 | 11 (13)         | 4 (23)                    | 4 (57)          | 0.01    |
| Articular                 | 59 (73)         | 12 (70)                   | 5 (71)          | 0.98    |
| Cutaneous                 | 6 (7)           | 1 (6)                     | 1 (14)          | 0.77    |
| Pulmonary                 | 0 (0)           | 3 (18)                    | 2 (28)          | <0.001  |
| Renal                     | 0 (0)           | 0 (0)                     | 0 (0)           | -       |
| Muscular                  | 0 (0)           | 0 (0)                     | 0 (0)           | -       |
| Peripheral Nervous system | 13 (16)         | 4 (23)                    | 1 (14)          | 0.74    |
| Central nervous system    | 0 (0)           | 0 (0)                     | 0 (0)           | -       |
| Hematological             | 7 (9)           | 8 (47)                    | 2 (28)          | <0.001  |
| Biological                | 22 (27)         | 4 (23)                    | 2 (28)          | 0.95    |

ESSDAI, EULAR Sjögren's syndrome disease activity index; SUA, serum uric acid.
